# Supplementary material
Source: MDPI journal article supplement (https://www.mdpi.com/1424-2818/15/4/567)
Supplement: s1 [file s1]

## Supplementary materials

**Table S1.** Microsatellite primers. Characteristics of the 12 primers used for the genotyping, showing the name of the locus, the primer sequences (F - forward, R - reverse), final concentrations for the primer mix (Primer conc.), allele size ranges of the Finnish golden eagle population, original species for which the primers were developed, and their corresponding reference. Multiplexing these loci was described in [39], except that one locus (Aa50) was removed from this study due to it being homozygous in our preliminary analyses.

| Locus    | Primer sequence                                                         | Primer conc. (μM) | Allele size range (bp) | Original species                                        |
|----------|-------------------------------------------------------------------------|-------------------|------------------------|---------------------------------------------------------|
| Aa02     | F: CTG CAG ATT TCA CCT GTT CTG<br>R: CTT CCA GGT CTT GCA GTT TAC C      | 0.4               | 128–146                | Spanish imperial eagle ( <i>Aquila adalberti</i> ) [92] |
| Aa04     | F: TGC AGC TCA AAA GCA AAG G<br>R: CAA CCC CAA CTC TCA CAC CT           | 0.25              | 117–159                | Spanish imperial eagle ( <i>A. adalberti</i> ) [92]     |
| Aa11     | F: ACG AGC TTA TCT TTG ACC AAG C<br>R: CTT TGT TTC AGC TGT TCC AGG      | 0.6               | 239–279                | Spanish imperial eagle ( <i>A. adalberti</i> ) [92]     |
| Aa15     | F: TCA CTG ACC TGC CCT CTA CA<br>R: CCA ACC CTC TAG TCG TCC AC          | 0.125             | 194–208                | Spanish imperial eagle ( <i>A. adalberti</i> ) [92]     |
| Aa26     | F: GCA AAG GTA AAC TGC ATC TGG<br>R: ATG CAC TAT TGG TAA ACA GGC A      | 0.125             | 139–155                | Spanish imperial eagle ( <i>A. adalberti</i> ) [92]     |
| Aa27     | F: GAG ATG TCT TCA CAG CTT GGC<br>R: AAG TCT CAG AGA CTG ACG GAC C      | 0.11              | 84–100                 | Spanish imperial eagle ( <i>A. adalberti</i> ) [92]     |
| Aa35     | F: GCA GCA GAA AGT GCA TAC GA<br>R: GAC CAA ATG AAA TGC GCC             | 0.5               | 231–267                | Spanish imperial eagle ( <i>A. adalberti</i> ) [92]     |
| Aa36     | F: ACA GGC CAG CAC CAA GAG<br>R: TTT GGA GCC ATT GTT ACC GT             | 0.25              | 88–132                 | Spanish imperial eagle ( <i>A. adalberti</i> ) [92]     |
| Aa39     | F: TTC TGT TTT TCC ACT TGC TTG<br>R: ATT GAG CTC ACA AAA ACA AAG G      | 0.8               | 182–200                | Spanish imperial eagle ( <i>A. adalberti</i> ) [92]     |
| Aa43     | F: CCA CAC TGA GAA ACT CCT GTT G<br>R: TTC CTG AGA GCT CTT CCT GC       | 0.125             | 103–129                | Spanish imperial eagle ( <i>A. adalberti</i> ) [92]     |
| NVHfr142 | F: CCA CCC CTC TGC CAC TCA<br>R: CCC CTG TCA GCT AAA CAC ATC AC         | 0.6               | 173–193                | Gyr Falcon ( <i>Falco rusticolus</i> ) [93]             |
| NVHfr206 | F: ATC TAA TGG GCT TTC CTG GAT TT<br>R: GAC ATT TTC CTC ATA GGC AAC TGA | 0.25              | 153–169                | Gyr Falcon ( <i>F. rusticolus</i> ) [93]                |

**Table S2.** Datasets used for different analyses with the number of samples used.

| Analysis                                                                  | Dataset                                                                                                                                                                             | Number of samples |
|---------------------------------------------------------------------------|-------------------------------------------------------------------------------------------------------------------------------------------------------------------------------------|-------------------|
| Microsatellite error rate calculations for the total dataset (Table S3)   | Replicated samples from the complete dataset                                                                                                                                        | 372               |
| Genetic diversity of microsatellite loci for the total dataset (Table S3) | Complete dataset                                                                                                                                                                    | 2215              |
| Microsatellite error rates for the chick dataset (Table S4)               | Replicated chick samples                                                                                                                                                            | 41                |
| Genetic diversity of microsatellite loci for the chick dataset (Table S4) | Chick samples                                                                                                                                                                       | 935               |
| Genetic diversity and population structure (microsatellites)              | Chick samples with a minimum of 75% genotyping success, one chick per territory                                                                                                     | 297               |
| Genetic diversity and population structure (mtDNA)                        | Chick samples with a 100% amplification success of microsatellite loci; and from different nests to cover the distribution range of the species in Finland, one chick per territory | 88                |
| Turnover                                                                  | Chick samples                                                                                                                                                                       | 935               |
| Natal dispersal                                                           | Complete dataset                                                                                                                                                                    | 2215              |

**Table S3.** Characteristics of used microsatellite loci in the total dataset. Error rate per all loci (ER), percentage of successfully amplified alleles (%), polymorphic information content (PIC) of each locus, observed ( $H_o$ ) and expected ( $H_e$ ) heterozygosities, number of alleles (A), allelic richness (AR) based on a minimum of 1046 diploid individuals, inbreeding coefficients ( $F_{IS}$ ) for each locus, and the mean values over all loci.

| Locus    | ER    | %         | PIC   | $H_o$ | $H_e$ | A  | AR    | $F_{IS}$      |
|----------|-------|-----------|-------|-------|-------|----|-------|---------------|
| Aa02     | 0.080 | 91%       | 0.478 | 0.503 | 0.528 | 9  | 8.50  | <b>0.048</b>  |
| Aa04     | 0.089 | 94%       | 0.677 | 0.723 | 0.706 | 14 | 13.26 | <b>-0.024</b> |
| Aa11     | 0.063 | 88%       | 0.600 | 0.560 | 0.632 | 13 | 11.89 | <b>0.114</b>  |
| Aa15     | 0.086 | 97%       | 0.408 | 0.417 | 0.430 | 9  | 8.46  | <b>0.031</b>  |
| Aa26     | 0.048 | 73%       | 0.651 | 0.670 | 0.695 | 8  | 7.98  | <b>0.037</b>  |
| Aa27     | 0.063 | 90%       | 0.531 | 0.593 | 0.590 | 8  | 7.39  | -0.005        |
| Aa35     | 0.064 | 89%       | 0.578 | 0.548 | 0.645 | 17 | 14.36 | <b>0.149</b>  |
| Aa36     | 0.053 | 84%       | 0.777 | 0.726 | 0.804 | 21 | 20.50 | <b>0.097</b>  |
| Aa39*    | 0.025 | 47%       | 0.659 | 0.437 | 0.677 | 13 | 13.00 | <b>0.354</b>  |
| Aa43     | 0.071 | 99%       | 0.638 | 0.665 | 0.678 | 9  | 7.92  | 0.019         |
| NVHfr142 | 0.027 | 80%       | 0.577 | 0.528 | 0.643 | 10 | 9.56  | <b>0.178</b>  |
| NVHfr206 | 0.011 | 78%       | 0.044 | 0.034 | 0.044 | 9  | 7.958 | <b>0.231</b>  |
| Mean     | 0.057 | 84%/88%** | 0.552 | 0.534 | 0.589 | 12 | 10.90 | <b>0.095</b>  |

Significant deviations ( $P < 0.05$ ) from Hardy–Weinberg equilibrium expectations are in bold.

\*Locus removed from further analyses.

\*\*With locus Aa39 included and excluded, respectively.

**Table S4.** Characteristics of used microsatellite loci in the chick dataset. Error rate per all loci (ER), percentage of successfully amplified alleles (%), polymorphic information content (PIC) of each locus, observed ( $H_o$ ) and expected ( $H_e$ ) heterozygosities, number of alleles (A), allelic richness (AR) based on a minimum of 860 diploid individuals, inbreeding coefficients ( $F_{IS}$ ) for each locus, and the mean values over all loci.

| Locus    | ER    | %         | PIC   | $H_o$ | $H_e$ | A    | AR   | $F_{IS}$     |
|----------|-------|-----------|-------|-------|-------|------|------|--------------|
| Aa02     | 0.047 | 99%       | 0.480 | 0.547 | 0.536 | 6    | 3.15 | -0.058       |
| Aa04     | 0.089 | 99%       | 0.707 | 0.717 | 0.735 | 13   | 5.47 | <b>0.053</b> |
| Aa11     | 0.023 | 98%       | 0.593 | 0.607 | 0.627 | 9    | 4.30 | 0.048        |
| Aa15     | 0.021 | 100%      | 0.405 | 0.423 | 0.428 | 5    | 3.26 | -0.049       |
| Aa26     | 0.012 | 92%       | 0.655 | 0.701 | 0.702 | 7    | 4.27 | <b>0.016</b> |
| Aa27     | 0.010 | 98%       | 0.527 | 0.563 | 0.587 | 7    | 3.24 | 0.090        |
| Aa35     | 0.027 | 97%       | 0.584 | 0.611 | 0.648 | 7    | 3.73 | 0.063        |
| Aa36     | 0.015 | 99%       | 0.787 | 0.752 | 0.813 | 16   | 5.88 | <b>0.109</b> |
| Aa39*    | 0.030 | 68%       | 0.749 | 0.547 | 0.768 | 13   | 5.62 | 0.132        |
| Aa43     | 0.011 | 100%      | 0.645 | 0.661 | 0.685 | 7    | 4.34 | 0.030        |
| NVHfr142 | 0.000 | 95%       | 0.577 | 0.620 | 0.643 | 7    | 3.54 | -0.026       |
| NVHfr206 | 0.000 | 93%       | 0.033 | 0.035 | 0.034 | 3    | 1.34 | -0.023       |
| Mean     | 0.024 | 95%/97%** | 0.545 | 0.567 | 0.585 | 7.91 | 3.87 | <b>0.033</b> |

Significant deviations ( $P < 0.05$ ) from Hardy–Weinberg equilibrium expectations are in bold.

\*Locus removed from further analyses.

\*\*With locus Aa39 included and excluded, respectively.

**Table S5.** Mitochondrial haplotype information. Haplotypes found in this study (393 bp) with haplotype frequencies (number of individuals with a haplotype) and GenBank accession numbers to them. Also, here are the amalgamated haplotypes, i.e., haplotypes from previous studies to which haplotypes of this study match in a 338 bp alignment; H – Holarctic, M – Mediterranean, NA – North American, and EST – Estonian. The alignment to GenBank sequences resulted in a loss of two single nucleotide polymorphism positions, masking the divergence between some haplotypes found in this study: FIN1, FIN4, and FIN11 are amalgamated to H1; FIN3 and FIN6 are amalgamated to H12; FIN9 and FIN 16 are amalgamated to NA12. Three haplotypes (FIN5, FIN10, and FIN17) are newly discovered.

| Haplotype, this study, 393 bp | Haplotype frequency | GenBank accession number, this study | Amalgamated haplotype, alignment 338 bp | GenBank accession number to the amalgamated haplotype |
|-------------------------------|---------------------|--------------------------------------|-----------------------------------------|-------------------------------------------------------|
| FIN1                          | 54                  | OQ679875                             | H1                                      | KR259260.1 [40]                                       |
| FIN2                          | 4                   | OQ679876                             | H4                                      | KR259263.1 [40]                                       |
| FIN3                          | 4                   | OQ679877                             | H12                                     | KR259271.1 [40]                                       |
| FIN4                          | 1                   | OQ679878                             | H1                                      | KR259260.1 [40]                                       |
| FIN5                          | 1                   | OQ679879                             | -                                       | -                                                     |
| FIN6                          | 1                   | OQ679880                             | H12                                     | KR259271.1 [40]                                       |
| FIN7                          | 1                   | OQ679881                             | M1                                      | KR259251.1 [40]                                       |
| FIN8                          | 2                   | OQ679882                             | H2                                      | KR259261.1 [40]                                       |
| FIN9                          | 2                   | OQ679883                             | NA12                                    | MG491981.1 [71]                                       |
| FIN10                         | 1                   | OQ679884                             | -                                       | -                                                     |
| FIN11                         | 3                   | OQ679885                             | H1                                      | KR259260.1 [40]                                       |
| FIN12                         | 6                   | OQ679886                             | H17                                     | KR259276.1 [40]                                       |
| FIN13                         | 2                   | OQ679887                             | H14                                     | KR259273.1 [40]                                       |
| FIN14                         | 3                   | OQ679888                             | EST-18, EST-25                          | MN105931.1, MN105938.1 [66]                           |
| FIN15                         | 1                   | OQ679889                             | H10                                     | KR259269.1 [40]                                       |
| FIN16                         | 1                   | OQ679890                             | NA12                                    | MG491981.1 [71]                                       |
| FIN17                         | 1                   | OQ679891                             | -                                       | -                                                     |

**Figure S1.** Results from the Structure analysis of Finnish golden eagles using 11 microsatellite loci. (a) Mean LnP-values for  $K = 1-5$ . (b) Bar plots of genetic assignment of individuals for  $K = 2$  to 5, where each bar represents an individual and colours represent the proportion of assignment to a cluster ( $K$ ). The results show no population genetic structure of Finnish golden eagles.

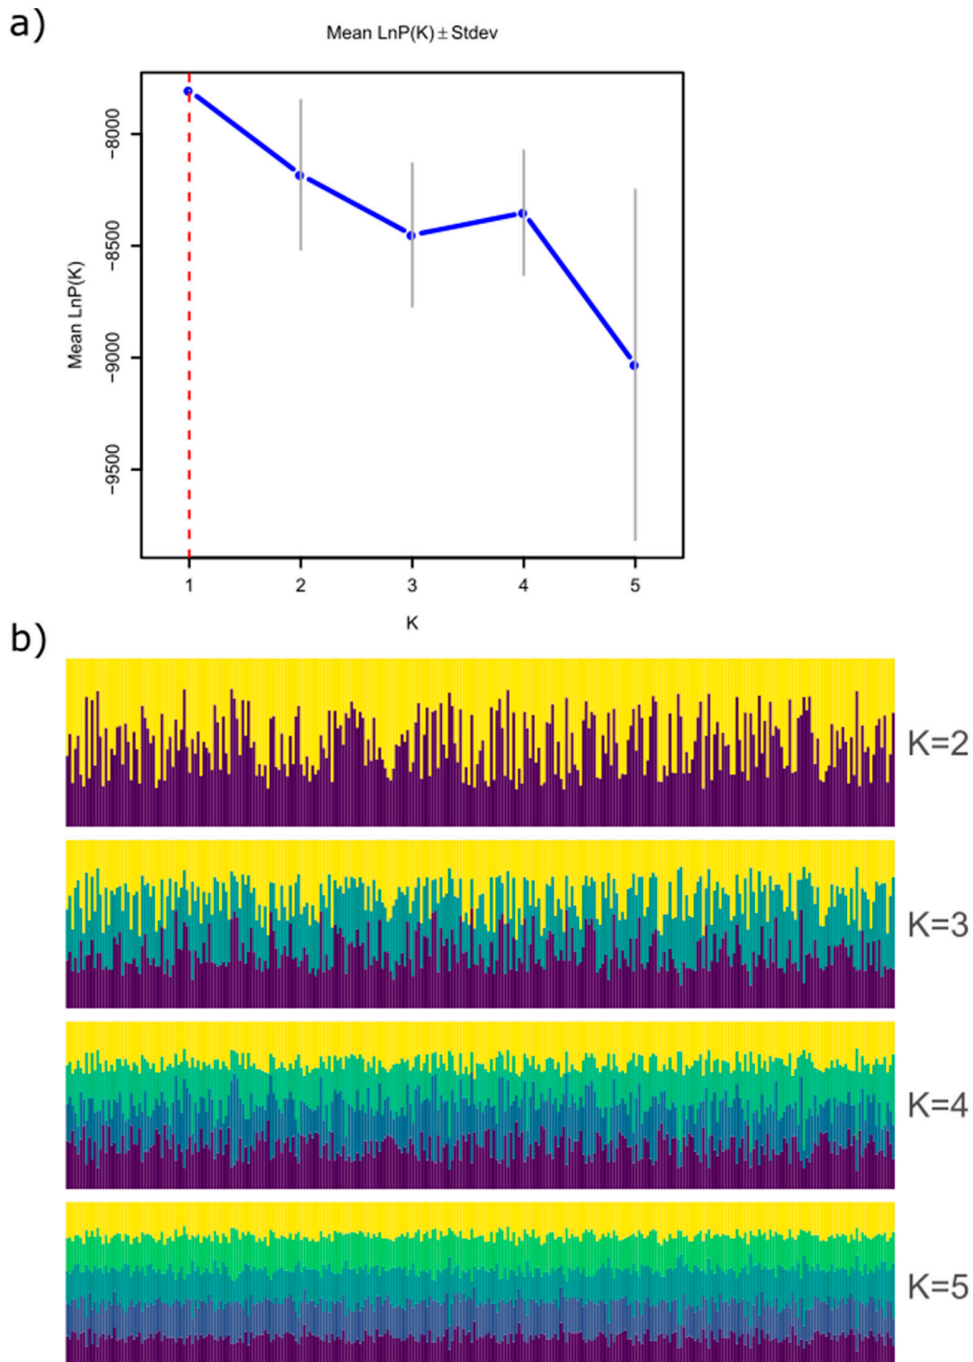

**Figure S2.** Median-joining haplotype network of Finnish golden eagles. The Northern Finland group includes individuals from the reindeer herding area, and the Southern Finland group - outside the reindeer herding area. In total, there are 17 haplotypes, of which 16 belong to the Holarctic lineage, and one (FIN7) - to the Mediterranean lineage [40]. Each line between haplotypes/nodes represents a single mutation step. The sizes of the circles reflect haplotype frequencies.

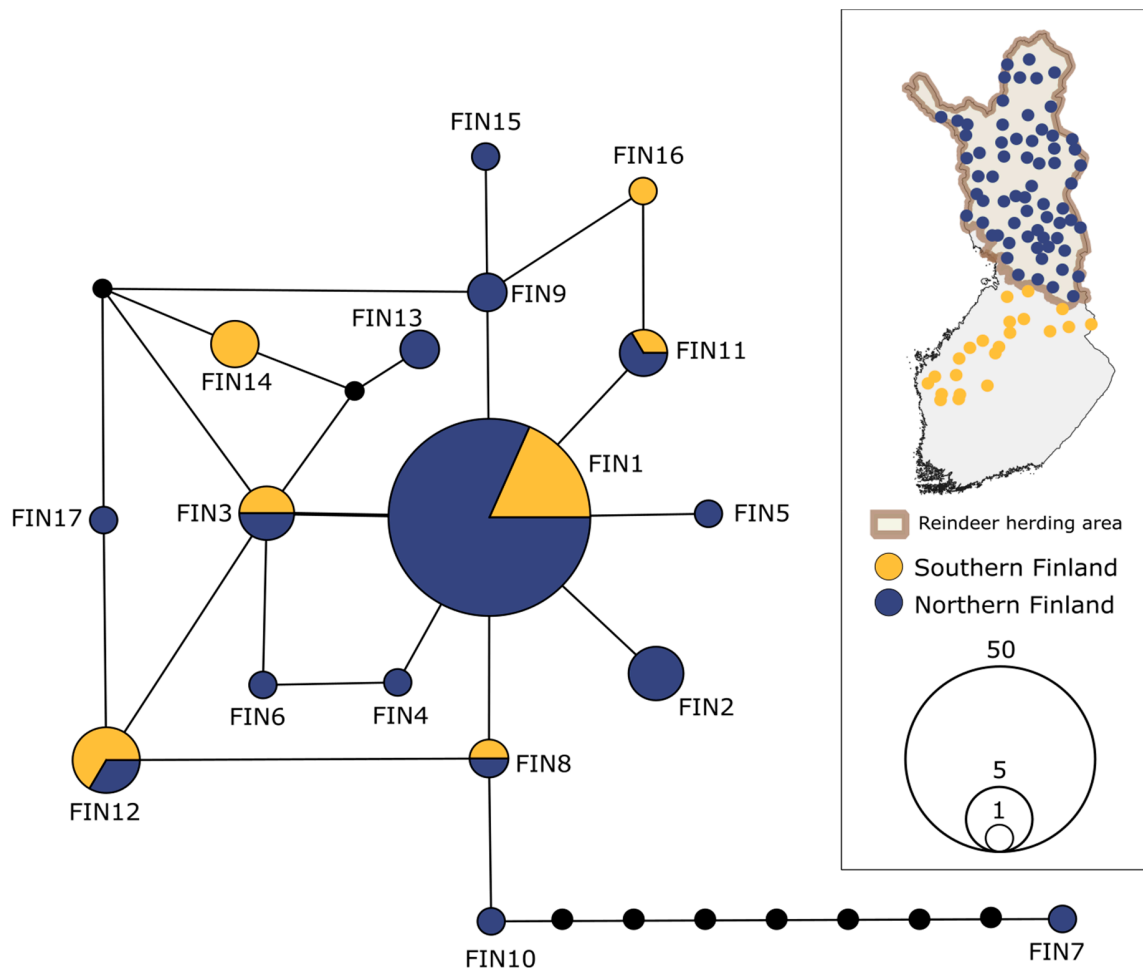

## References to supplementary materials

39. Bielikova, M.; Ficek, A.; Valkova, D.; Turna, J. Multiplex PCR amplification of 13 microsatellite loci for *Aquila chrysaetos* in forensic applications. *Biologia* **2010**, *65*, 1081–1088.
40. Nebel, C.; Gamauf A.; Haring, E.; Segelbacher, G.; Villers, A.; Zachos, F.E. Mitochondrial DNA analysis reveals Holarctic homogeneity and a distinct Mediterranean lineage in the Golden Eagle (*Aquila chrysaetos*). *Biol. J. Linn. Soc.* **2015**, *116*, 328–340.
66. Nebel, C.; Gamauf A.; Haring, E.; Segelbacher, G.; Väli, Ü.; Villers, A.; Zachos, F.E. New insights into population structure of the European Golden Eagle (*Aquila chrysaetos*) revealed by microsatellite analysis, *Biol. J. Linn. Soc.* **2019**, *128*, 611–631; DOI: 10.1093/biolinnean/blz130.
71. Judkins, M. E.; van den Bussche, R. A. Holarctic Phylogeography of Golden Eagles (*Aquila Chrysaetos*) and Evaluation of Alternative North American Management Approaches. *Biol. J. Linn. Soc.* **2018**, *123*, 471–482; DOI: 10.1093/biolinnean/blx138.
92. Martínez-Cruz, B.; David, V.A.; Godoy, J.A.; Negro, J.J.; O'Brien, S.J.; Johnson, W.E. Eighteen polymorphic microsatellite markers for the highly endangered Spanish imperial eagle (*Aquila adalberti*) and related species. *Mol. Ecol. Notes* **2002**, *2*, 323–326.
93. Nesje, M.; Røed, K.H. Microsatellite DNA markers from the gyrfalcon (*Falco rusticolus*) and their use in other raptor species. *Mol. Ecol.* **2000**, *9*, 1438–1440.
